# Supplementary material for: Standardized Assessment of Biodiversity Trends in Tropical Forest Protected Areas: The End Is Not in Sight
Source: PubMed Central journal article supplement (PMC4718630; doi:10.1371/journal.pbio.1002357), 2016-01-19
Supplement: pbio.1002357.s011.pdf [file pbio.1002357.s011.pdf]

| <b>a.</b>                 | Intercept | Beta  | df | logLik | AICc  | delta | weight |
|---------------------------|-----------|-------|----|--------|-------|-------|--------|
| Null Model                | -1.22     | NA    | 1  | -3.87  | 10.05 | 0     | 0.36   |
| % Populations Not Hunted  | -1.23     | 0.06  | 2  | -3.87  | 12.74 | 2.69  | 0.09   |
| ZOI Edge Density          | -1.23     | 0.18  | 2  | -3.87  | 12.74 | 2.7   | 0.09   |
| % Populations Hunted      | -1.23     | 0.09  | 2  | -3.87  | 12.74 | 2.7   | 0.09   |
| Human Population Density  | -1.23     | 0.2   | 2  | -3.87  | 12.75 | 2.7   | 0.09   |
| Proportion ZOI Forested   | -1.23     | -0.09 | 2  | -3.87  | 12.75 | 2.7   | 0.09   |
| Protected Area Size       | -1.22     | -0.17 | 2  | -3.88  | 12.76 | 2.71  | 0.09   |
| Years of Camera Trap Data | -1.23     | 0.21  | 2  | -3.89  | 12.78 | 2.73  | 0.09   |
| <b>b.</b>                 |           |       |    |        |       |       |        |
| Null Model                | -1.61     | NA    | 1  | -2.73  | 7.78  | 0     | 0.36   |
| Proportion ZOI Forested   | -1.62     | -0.03 | 2  | -2.73  | 10.47 | 2.69  | 0.09   |
| Human Population Density  | -1.61     | -0.13 | 2  | -2.74  | 10.47 | 2.7   | 0.09   |
| Years of Camera Trap Data | -1.65     | -0.19 | 2  | -2.74  | 10.48 | 2.7   | 0.09   |
| % Populations Not Hunted  | -1.65     | 0.27  | 2  | -2.75  | 10.5  | 2.72  | 0.09   |
| % Populations Hunted      | -1.64     | -0.3  | 2  | -2.75  | 10.51 | 2.73  | 0.09   |
| ZOI Edge Density          | -1.63     | -0.36 | 2  | -2.76  | 10.51 | 2.73  | 0.09   |
| Protected Area Size       | -1.61     | 0.35  | 2  | -2.76  | 10.52 | 2.74  | 0.09   |
