# Supplementary material for: Standardized Assessment of Biodiversity Trends in Tropical Forest Protected Areas: The End Is Not in Sight
Source: PubMed Central journal article supplement (PMC4718630; doi:10.1371/journal.pbio.1002357), 2016-01-19
Supplement: pbio.1002357.s015.pdf [file pbio.1002357.s015.pdf]

### Case 1 Model

```
model {  
  
  # Priors for constant parameters  
  
  alpha ~ dnorm(0,0.01)  
  alphap ~ dnorm(0,0.01)  
  alphag ~ dnorm(0,0.01)  
  
  # Priors for parameters associated with a covariate, but the parameter is time  
invariant  
  for(i in 1:11){  
    beta[i] ~ dnorm(0,0.01)  
    w[i] ~ dbern(0.5)  
  }  
  
  #Ecological Model-define gamma and phi  
  
  for (i in 1:nsite){  
    for (t in 2:nyear){  
      logit(gamma[i,t-1])<- alphag + w[4]*beta[4]*rainfall6[t]  
      + w[5]*beta[5]*maxtemp6[t]  
      + w[6]*beta[6]*mintemp6[t]  
      + w[10]*beta[10]*people[i,t]  
  
      logit(phi[i,t-1])<-alphap + w[7]*beta[7]*rainfall6[t]  
      + w[8]*beta[8]*maxtemp6[t]  
      + w[9]*beta[9]*mintemp6[t]  
      + w[11]*beta[11]*people[i,t]  
    }  
  }  
  
  #Ecological Model - define psi1 and subsequent ones  
  for (i in 1:nsite){  
    logit(psi1[i])<-alpha + w[1]*beta[1]*elevation[i,1]  
    + w[2]*beta[2]*people[i,1]  
    + w[3]*beta[3]*edge[i,1]  
  
    z[i,1] ~ dbern(psi1[i])  
  
    for (t in 2:nyear){  
      muZ[i,t]<- z[i,t-1]*phi[i,t-1] + (1-z[i,t-1])*gamma[i,t-1]    }  
  }  
}
```

SI Text for Beaudrot, Ahumada, et al. *PLoS Biology*  
“Terrestrial Vertebrate Trends in Tropical Protected Areas”

```
z[i,t] ~ dbern(muZ[i,t])
} #t
} #i

#Observation process - no covariates
for(t in 1:nyear){
  p[t] ~ dunif(0,1)
} #t

for (i in 1:nsite){
  for (j in 1:nrep){
    for (t in 1:nyear){
      muy[i,j,t] <- z[i,t]*p[t]
      y[i,j,t] ~ dbern(muy[i,j,t])
    } #t
  } #j
} #i

# Derived quantities (finite sample estimates)

for(t in 1:nyear){
  psi[t] <- sum(z[1:nsite,t])/nsite
} #t

}
```

## Case 2 Model

```
model {  
  
# Specify priors  
psi1 ~ dunif(0, 1) #first year occupancy  
  
phi ~ dunif(0, 1) # apparent survival  
gamma ~ dunif(0, 1) # colonization  
p ~ dunif(0, 1) # detection probability  
  
# Ecological submodel: Define state conditional on parameters  
for (i in 1:nsite){  
  z[i,1] ~ dbern(psi1)  
  for (k in 2:nyear){  
    muZ[i,k]<- z[i,k-1]*phi + (1-z[i,k-1])*gamma  
    z[i,k] ~ dbern(muZ[i,k])  
  } #k  
} #i  
  
# Observation model  
for (i in 1:nsite){  
  for (j in 1:nrep){  
    for (k in 1:nyear){  
      muy[i,j,k] <- z[i,k]*p  
      y[i,j,k] ~ dbern(muy[i,j,k])  
    } #k  
  } #j  
} #i  
  
# Derived parameters: Sample occupancy  
  
for (k in 1:nyear){  
  psi[k]<-sum(z[1:nsite,k])/nsite  
}  
}
```

### Case 3 Code

```
require(binom)

#Function that creates some fake data for a species
#that is rare
f.data.generator<-function(sites,days,psi,p,phi,gamma,nyears) {
  #first year of data
  y1<-matrix(NA,nr=sites,nc=days)
  #generate the expected occupancies
  z<-rbinom(sites,1,psi)
  #generate the observations
  for(i in 1:sites)
    y1[i,]<-rbinom(days,1,z[i]*p)
  #subsequent years
  #three dimensional matrix to store the results
  yk<-array(NA,dim=c(sites,days,nyears))
  yk[,1]<-y1
  for(k in 2:nyears){
    #generate the deterministic part of the model
    occ<-apply(yk[,k-1],1,max,na.rm=T)
    z<-rbinom(sites,1,occ*phi+(1-occ)*gamma)
    #generate the observations
    for(i in 1:sites)
      yk[i,,k]<-rbinom(days,1,z[i]*p)
  }
  yk
}

#function to calculate the mode of a distribution
f.mode<-function(data){
  qwe<-density(data)
  qwe$x[which(qwe$y==max(qwe$y))]
}

# Create a new data set

data<-
f.data.generator(sites=60,days=15,psi=0.05,p=.05,phi=0.4,gamma=0.1,nyears=5)
#simulating some holes in the data
data[31:60,1:7,]<-NA
```

SI Text for Beaudrot, Ahumada, et al. *PLoS Biology*  
"Terrestrial Vertebrate Trends in Tropical Protected Areas"

```
data[1:30,8:15,]<-NA
data[60,,]<-NA
data[13,,]<-NA

nyears <- dim(data)[3]
# calculate whether the species was present or absent at each point each year
pa.year<-apply(data,c(1,3),max,na.rm=T)
pa.year[pa.year=="-Inf"]<-NA

# how many camera traps were functional?
n.cams <- apply(pa.year,2,function(x) {sum(!is.na(x))})

# How many detections of each species per year?
n.dets <- apply(pa.year,2,sum,na.rm=T)

# Average number of detections? If mean.dets < 5 we use this process to calculate
# occupancy
mean.dets <- mean(n.dets)

# naive occupancy
occ <- n.dets/n.cams
#new.occ will contain 1000 realizations of each
new.occ <- matrix(NA,nr=1000,nc=nyears)

for(i in 1:nyears){
  conf.bin <- binom.bayes(x=n.dets[i],n=n.cams[i],conf.level=0.95,type="highest")
  mod.bin <- binom.bayes.densityplot(bayes=conf.bin)
  new.occ[,i] <-
  sample(x=mod.bin$data$xx,size=1000,replace=T,prob=mod.bin$data$yy)
}

# Check everything makes sense and graph it
conf.lims <- apply(new.occ,2,quantile,c(0.025,0.975))
occ.mode <- apply(new.occ,2,f.mode)

#plot mode of the distribution plus confidence limits
plot(1:nyears,occ.mode,t='l',ylim=c(0,1))
lines(1:nyears,conf.lims[1,],lty=2)
lines(1:nyears,conf.lims[2,],lty=2)
#observed
points(1:nyears,occ)
```

## R Code

```
#### Beaudrot, Ahumada, et al. PLoS Biology
#### Examine TEAM population status based on WPI output

rm(list=ls())
library(Deducer)
library(extracat)
library(MuMIn)
library(ggplot2)
library(ggthemes)

##### Data input and formatting
#####
SiteData <- read.csv(file="SiteData_TableS1.csv")
PopData <- read.csv(file="PopulationData_TableS2.csv")
Merged <- merge(SiteData, PopData, by.x="Code", by.y="Site")
mass_cat <- ifelse(Merged$mass<1000, "1", ifelse(Merged$mass>=1000 &
Merged$mass<10000, "2", ifelse(Merged$mass>=10000, "3", NA)))
lab <- ifelse(mass_cat=="1", "0.1 - 1 kg",
ifelse(mass_cat=="2", "1 - 10 kg",
ifelse(mass_cat=="3", "10 kg or more", NA)))

# Overall data for analysis
WPI.all <- data.frame("Mass"=lab, Merged)
WPI.all$Case <- factor(WPI.all$Case)

# Excludes Unknown Population Status
WPI <- WPI.all[WPI.all$Status!="Unknown",]
WPI$Status <- factor(WPI$Status)

# Excludes sites with no reported hunting (NNN, YAN and COU)
HuntData <- WPI.all[WPI.all$Code!="NNN" & WPI.all$Code!="COU" &
WPI.all$Code!="YAN",]

# Data frame with information on the 244 species
unique.species <- WPI.all[unique(WPI.all$Species),c(1, 20:21, 23:25)]

##### END DATA FORMATTING
#####

##### BEGIN SUMMARIZATION #####

# Determine # of unique species
```

SI Text for Beaudrot, Ahumada, et al. *PLoS Biology*  
"Terrestrial Vertebrate Trends in Tropical Protected Areas"

```
length(unique(WPI.all$Species))
length(unique(WPI.all$Species[WPI.all$Class=="Aves"]))
length(unique(WPI.all$Species[WPI.all$Class=="Mammalia"]))

# Determine % of populations for each population status
table(WPI.all$Status)
(table(WPI.all$Status)/dim(WPI.all)[1])*100

# Determine breakdown and % populations by IUCN categories
table(WPI.all$IUCN)
(table(WPI.all$IUCN)/dim(WPI.all)[1])*100

# Determine # species per IUCN category
table(unique.species$IUCN)

# Determine breakdown and % by Class
table(WPI.all$Class)
table(WPI.all$Status, WPI.all$Class)
(table(WPI.all$Status, WPI.all$Class)[,1]/table(WPI.all$Class)[1])*100
(table(WPI.all$Status, WPI.all$Class)[,2]/table(WPI.all$Class)[2])*100

# Determine the # of populations evaluated and not evaluated (i.e. unknown)
sum(table(WPI.all$Status, WPI.all$Class)[4,]) # total unknown populations
table(WPI.all$Status, WPI.all$Class)[4,] # unknown populations by class
sum(table(WPI.all$Status, WPI.all$Class)[-4,]) # total evaluated populations
colSums(table(WPI.all$Status, WPI.all$Class)[-4,]) # evaluated populations by class

# Determine the # of unique species not evaluated (i.e. unknown)
length(unique(WPI.all$Species[WPI.all$Status=="Unknown"])) # Overall
length(unique(WPI.all$Species[WPI.all$Status=="Unknown" &
WPI.all$Class=="Aves"])) # Birds
length(unique(WPI.all$Species[WPI.all$Status=="Unknown" &
WPI.all$Class=="Mammalia"])) # Mammals

# Determine the # of unique species evaluated (i.e. not unknown)
length(unique(WPI.all$Species[WPI.all$Status!="Unknown"])) # Overall
length(unique(WPI.all$Species[WPI.all$Status!="Unknown" &
WPI.all$Class=="Aves"])) # Birds
length(unique(WPI.all$Species[WPI.all$Status!="Unknown" &
WPI.all$Class=="Mammalia"])) # Mammals

# Determine the number of species with only unknown populations observed at a
single site only
SingleSite <- table(WPI.all$Species, WPI.all$Status)
SingleSite <- SingleSite[rowSums(SingleSite)==1,]
SingleSite <- SingleSite[,4]
```

SI Text for Beaudrot, Ahumada, et al. *PLoS Biology*  
"Terrestrial Vertebrate Trends in Tropical Protected Areas"

```
length(SingleSite[SingleSite>0]) # Number of unknown populations at only one site
SinglePops <- names(SingleSite[SingleSite>0]) # Population names
SinglePops <- WPI.all[match(SinglePops, WPI.all$Species),]
table(SinglePops$Class) # By Class
table(SinglePops$IUCN) # By IUCN status

# Determine the number of species with only unknown populations at multiple sites
# Extract species with multiple populations
PopsPerSpecies <- table(WPI.all$Species, WPI.all$Status)
PopsPerSpecies <- cbind(PopsPerSpecies, tot=rowSums(PopsPerSpecies))
PopsPerSpecies <- as.data.frame(PopsPerSpecies)
PopsPerSpecies <- PopsPerSpecies[PopsPerSpecies$tot>1,] # Species at multiple
sites
dim(PopsPerSpecies) # Number of species (any population status) at multiple sites
UnknownOnly <-
PopsPerSpecies[PopsPerSpecies$tot==PopsPerSpecies$Unknown,]
UnknownOnly <- match(as.character(WPI.all$Species), rownames(UnknownOnly))
UnknownOnly <- cbind(WPI.all, UnknownOnly)
UnknownOnly <- na.omit(UnknownOnly)
length(unique(UnknownOnly$Species)) # Number of species with unknown only
populations at multiple sites
dim(UnknownOnly) # Number of populations for species with unknown only
populations at multiple sites
# Examine the attributes of the consistently unknown species
UnknownSpecies <- UnknownOnly[duplicated(UnknownOnly$Species)==FALSE,]
table(UnknownSpecies$IUCN)
# Determine the number of unknown populations from species evaluated at other
TEAM sites
table(WPI.all$Status)[4] - dim(SinglePops)[1] - dim(UnknownOnly)[1]
# Examine the number of populations of the consistently unknown species
sort(table(UnknownOnly$Species))

# Identify number of populations with unknowns excluded
length(unique(WPI$Species))
length(unique(WPI$Species[WPI$Class=="Aves"]))
length(unique(WPI$Species[WPI$Class=="Mammalia"]))

# Summarize species body size and guild data
summary(unique.species$mass)
table(unique.species$Mass, unique.species$Class)
table(unique.species$Guild, unique.species$Class)

# Summarize populations by hunting status
table(WPI.all$Hunted)
```



SI Text for Beaudrot, Ahumada, et al. *PLoS Biology*  
“Terrestrial Vertebrate Trends in Tropical Protected Areas”

```
##### END DATA SUMMARIZATION #####
```

```
##### BEGIN GOODNESS OF FIT TESTS #####
```

```
# Create matrix for G test across Case types
table(WPI.all$Case, WPI.all$Status) # Simplify table to exclude zero values
  mdat <- matrix(c(31, 32, 48, 26, 33, 29, 48, 63, 201), nrow=3, ncol=3,
  byrow=FALSE,
  dimnames=list(c("Case1", "Case2", "Case3"),
  c("Decreasing", "Increasing", "Stable")))

# Test proportion of unknown/dec/stable/inc across model Case types
likelihood.test(mdat) # All populations
likelihood.test(mdat[-3,]) # Exclude Case3 (populations with < 5 observations per
year)

# Test proportions across other attributes with (WPI.all) and without (WPI)
unknown populations

# Population status by class
likelihood.test(table(WPI$Class, WPI$Status))
likelihood.test(table(WPI.all$Class, WPI.all$Status))

# Population status by IUCN status
likelihood.test(table(WPI$IUCN, WPI$Status))
likelihood.test(table(WPI.all$IUCN, WPI.all$Status))

# Population status by body size category
likelihood.test(table(WPI$Mass, WPI$Status))
likelihood.test(table(WPI.all$Mass, WPI.all$Status))

# Population status by guild
likelihood.test(table(WPI$Guild, WPI$Status))
likelihood.test(table(WPI.all$Guild, WPI.all$Status))

# Population status within guilds by body size
likelihood.test(table(WPI.all$Status, WPI.all$Mass, WPI.all$Guild)[,1])
likelihood.test(table(WPI.all$Status, WPI.all$Mass, WPI.all$Guild)[,2])
likelihood.test(table(WPI.all$Status, WPI.all$Mass, WPI.all$Guild)[,3])
likelihood.test(table(WPI.all$Status, WPI.all$Mass, WPI.all$Guild)[,4])

# Population status by landscape type
likelihood.test(table(WPI$Landscape, WPI$Status))
likelihood.test(table(WPI.all$Landscape, WPI.all$Status))
```

SI Text for Beaudrot, Ahumada, et al. *PLoS Biology*  
"Terrestrial Vertebrate Trends in Tropical Protected Areas"

```
likelihood.test(table(WPI.all$Landscape, WPI.all$Status)[-1,])
likelihood.test(table(WPI.all$Landscape, WPI.all$Status)[-2,])
likelihood.test(table(WPI.all$Landscape, WPI.all$Status)[-3,])

# Hunting all sites
likelihood.test(table(WPI.all$Hunted, WPI.all$Code))
likelihood.test(table(WPI.all$Hunted, WPI.all$Class))
likelihood.test(table(WPI.all$Hunted, WPI.all$Landscape))
likelihood.test(table(WPI.all$Hunted, WPI.all$Landscape)[-1])
likelihood.test(table(WPI.all$Hunted, WPI.all$Landscape)[-2])

# Hunting only at 12 sites with hunted populations reported
likelihood.test(table(HuntData$Hunted, HuntData$Class))
likelihood.test(table(HuntData$Hunted, HuntData$IUCN))
likelihood.test(table(HuntData$Hunted, HuntData$Guild))
likelihood.test(table(HuntData$Hunted, HuntData$Mass))
likelihood.test(table(HuntData$Hunted, HuntData$Landscape))
likelihood.test(table(HuntData$Hunted, HuntData$Status))
likelihood.test(table(HuntData$Hunted, HuntData$Status)[-4])

# Population status by hunting status
likelihood.test(table(WPI$Hunted, WPI$Status))
likelihood.test(table(WPI.all$Hunted, WPI.all$Status))

##### END GOODNESS OF FIT TESTS #####

##### BEGIN DATA VIZUALIZATION #####

# Distribution of population trends and status classifications
WPIplot1 <- ggplot(WPI.all, aes(Slope, fill=factor(Status))) +
  geom_histogram(aes(y=..count..), binwidth=0.05) +
  xlim(-1.5, 1.5) +
  xlab("Median occupancy trend coefficient") +
  ylab("Populations")

WPIplot1 + theme_bw() + theme(panel.grid.major = element_blank(),
  panel.grid.minor = element_blank()) +
  theme(legend.position = c(0.15, 0.77)) +
  scale_fill_manual(values=c("chocolate2", "purple3", "gray55", "cornsilk2"),
  name="Population Status")

# Plot proportions by multiple categorical variables
```

SI Text for Beaudrot, Ahumada, et al. *PLoS Biology*  
"Terrestrial Vertebrate Trends in Tropical Protected Areas"

```
pdf(file="WPI_Extracat_SupplementalFigures.pdf")
```

```
rmb(formula= ~ Class + Status, data=WPI.all, col=c("chocolate2", "purple", "white",  
"gray55"),
```

```
label.opt=list(yaxis=TRUE, boxes=FALSE, lab.tv=FALSE, lab.cex=1,  
varnames=TRUE), gap.prop=0.07)
```

```
rmb(formula= ~ IUCN + Status, data=WPI.all, col=c("chocolate2", "purple", "white",  
"gray55"),
```

```
label.opt=list(yaxis=TRUE, boxes=FALSE, lab.tv=FALSE, lab.cex=1,  
varnames=TRUE), gap.prop=0.01)
```

```
rmb(formula= ~ Mass + Status, data=WPI.all, col=c("chocolate2", "purple", "white",  
"gray55"),
```

```
label.opt=list(yaxis=TRUE, boxes=FALSE, lab.tv=FALSE, lab.cex=1,  
varnames=TRUE), gap.prop=0.01)
```

```
rmb(formula= ~ Guild + Status, data=WPI.all, col=c("chocolate2", "purple", "white",  
"gray55"),
```

```
label.opt=list(yaxis=TRUE, boxes=FALSE, lab.tv=FALSE, lab.cex=1,  
varnames=TRUE), gap.prop=0.01)
```

```
rmb(formula= ~ Mass + Guild + Status, data=WPI.all, col=c("chocolate2", "purple",  
"white", "gray55"),
```

```
label.opt=list(yaxis=TRUE, boxes=FALSE, lab.tv=FALSE, lab.cex=0.7,  
varnames=TRUE), gap.prop=0.1)
```

```
rmb(formula= ~ Landscape + Status, data=WPI.all, col=c("chocolate2", "purple",  
"white", "gray55"),
```

```
label.opt=list(yaxis=TRUE, boxes=FALSE, lab.tv=FALSE, lab.cex=1,  
varnames=TRUE), gap.prop=0.01)
```

```
rmb(formula= ~ Landscape + Hunted, data=WPI.all, col=c("green4", "gray65",  
"blue3"),
```

```
label.opt=list(yaxis=TRUE, boxes=FALSE, lab.tv=FALSE, lab.cex=1,  
varnames=TRUE), gap.prop=0.01)
```

```
rmb(formula= ~ Mass + Guild + Hunted, data=HuntData, col=c("green4", "gray65",  
"blue3"),
```

```
label.opt=list(yaxis=TRUE, boxes=FALSE, lab.tv=FALSE, lab.cex=0.7,  
varnames=TRUE), gap.prop=0.07)
```

```
rmb(formula= ~ Hunted + Status, data=HuntData, col=c("chocolate2", "purple",  
"white", "gray55"),
```

```
label.opt=list(yaxis=TRUE, boxes=FALSE, lab.tv=FALSE, lab.cex=1,  
varnames=TRUE), gap.prop=0.07)
```

SI Text for Beaudrot, Ahumada, et al. *PLoS Biology*  
"Terrestrial Vertebrate Trends in Tropical Protected Areas"

```
rmb(formula= ~ Landscape + Guild + Status, data=WPI.all, col=c("chocolate2",  
"purple", "white", "gray55"),  
  label.opt=list(yaxis=TRUE, boxes=FALSE, lab.tv=FALSE, lab.cex=0.7,  
varnames=TRUE), gap.prop=0.07)  
  
rmb(formula= ~ Code + Guild + Status, data=WPI.all, col=c("chocolate2", "purple",  
"white", "gray55"),  
  label.opt=list(yaxis=TRUE, boxes=FALSE, lab.tv=FALSE, lab.cex=0.7,  
varnames=TRUE), gap.prop=0.07)  
dev.off()  
  
##### END DATA VIZUALIZATION #####  
  
#####BEGIN LOGISTIC REGRESSION WITH CONTINUOUS VARIABLES ###  
# Examine site-level % inc and % dec as a function of site-level variables  
SiteData  
  
Dec <- cbind(SiteData$Decrease.Per, 100-SiteData$Decrease.Per)/100  
m0 <- glm(Dec ~ 1, family="binomial")  
m1 <- glm(Dec ~ scale(log(SiteData$PA_Area)), family="binomial")  
m2 <- glm(Dec ~ scale(SiteData$PopDen), family="binomial")  
m3 <- glm(Dec ~ scale(SiteData$Forested), family="binomial")  
m4 <- glm(Dec ~ scale(SiteData$EdgeDensity), family="binomial")  
m5 <- glm(Dec ~ scale(SiteData$Per.HuntedY), family="binomial")  
m6 <- glm(Dec ~ scale(SiteData$Per.HuntedN), family="binomial")  
m7 <- glm(Dec ~ scale(SiteData$CTyears), family="binomial")  
Dec.table <- model.sel(m0, m1, m2, m3, m4, m5, m6, m7)  
  
Inc <- cbind(SiteData$Increase.Per, 100-SiteData$Increase.Per)/100  
m10 <- glm(Inc ~ 1, family="binomial")  
m11 <- glm(Inc ~ scale(log(SiteData$PA_Area)), family="binomial")  
m12 <- glm(Inc ~ scale(SiteData$PopDen), family="binomial")  
m13 <- glm(Inc ~ scale(SiteData$Forested), family="binomial")  
m14 <- glm(Inc ~ scale(SiteData$EdgeDensity), family="binomial")  
m15 <- glm(Inc ~ scale(SiteData$Per.HuntedY), family="binomial")  
m16 <- glm(Inc ~ scale(SiteData$Per.HuntedN), family="binomial")  
m17 <- glm(Inc ~ scale(SiteData$CTyears), family="binomial")  
Inc.table <- model.sel(m10, m11, m12, m13, m14, m15, m16, m17)  
##### END LOGISTIC REGRESSION #####
```
